# Supplementary material
Source: PubMed Central journal article supplement (PMC7399698)

(A)

—●— Plasma viral load  
—■— Genital tract viral load  
● CD4 count cells/uL

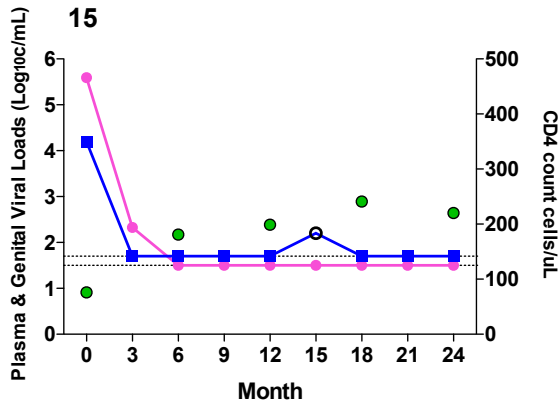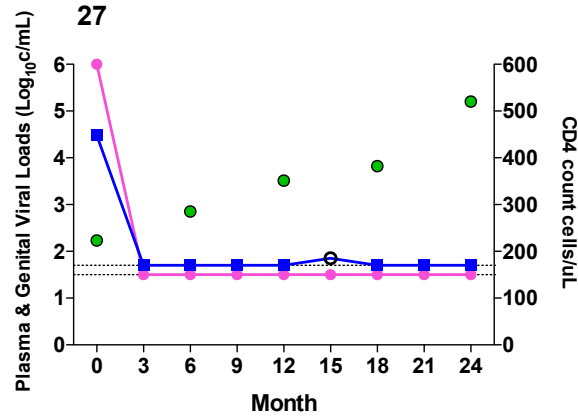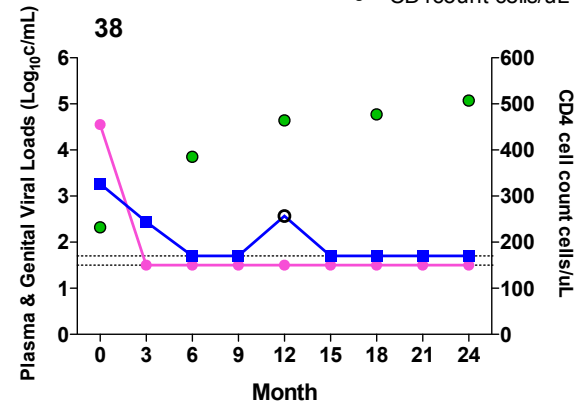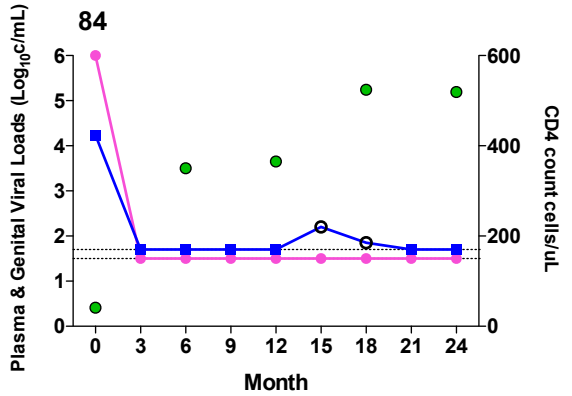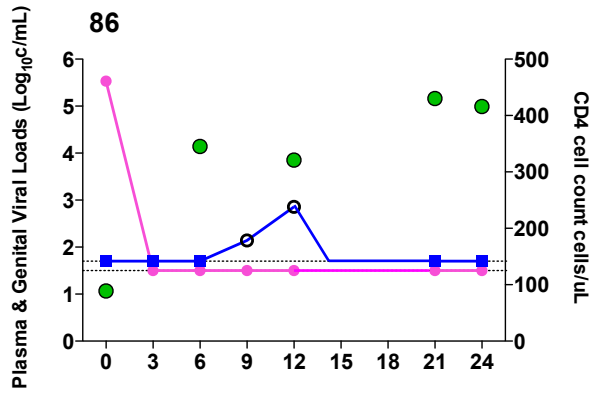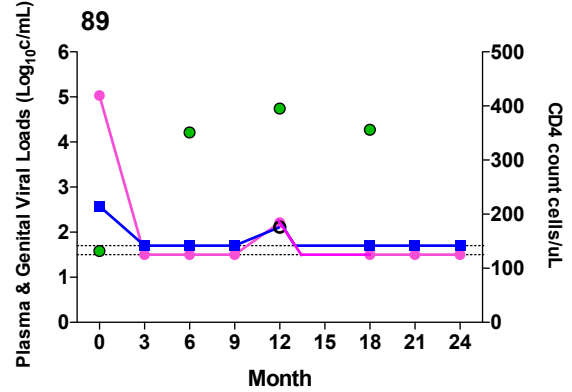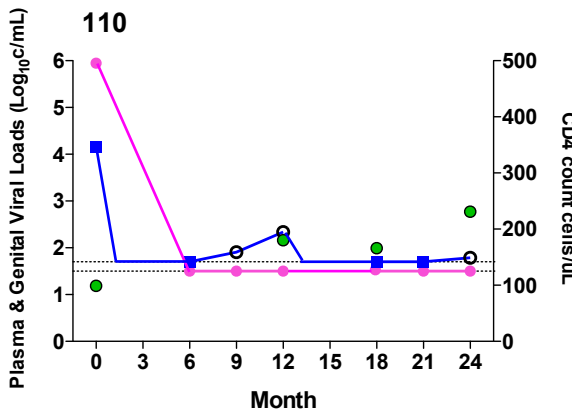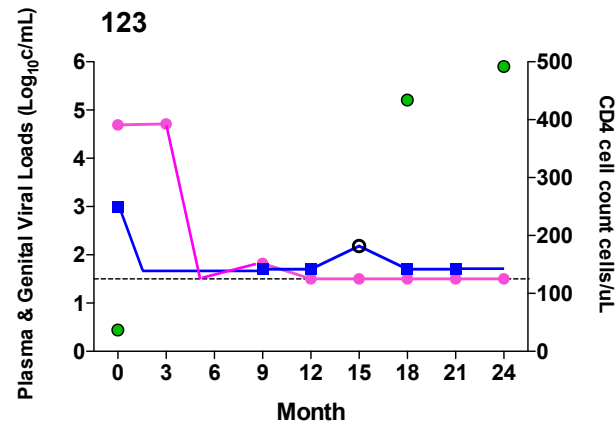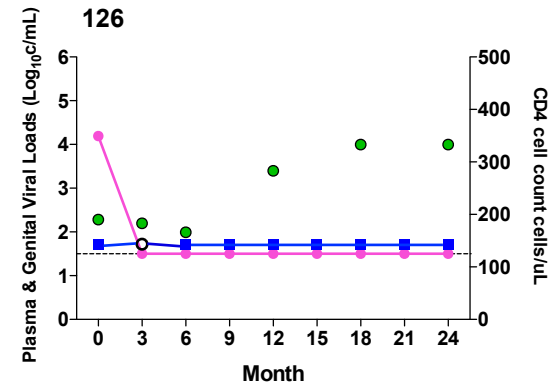

(B)

- Plasma viral load
- Genital tract viral load
- CD4 count cells/uL
- Rectal viral load

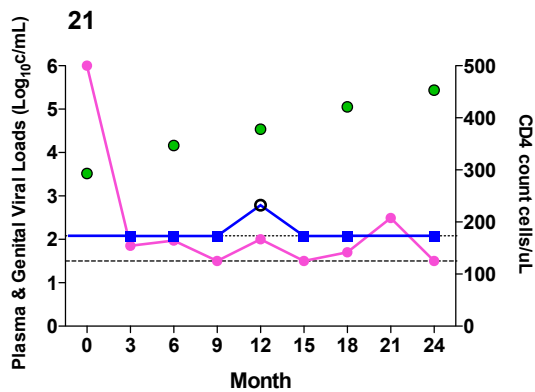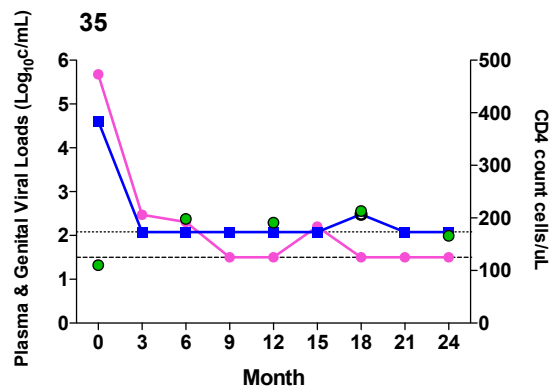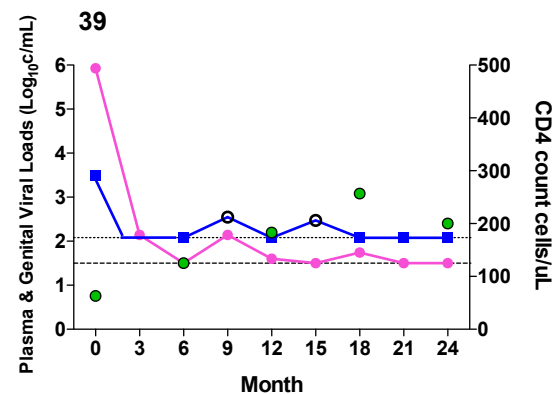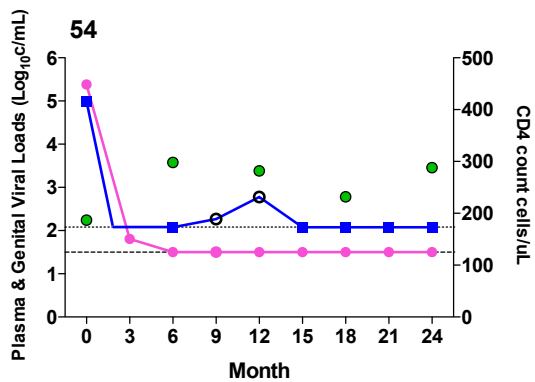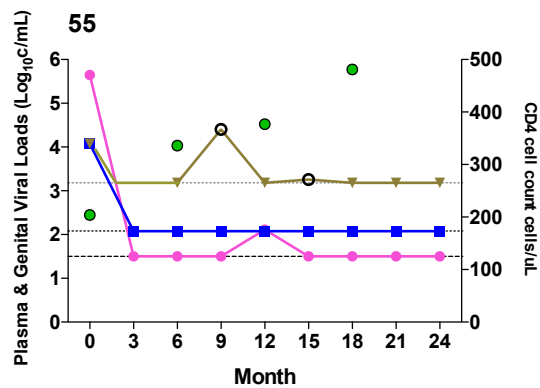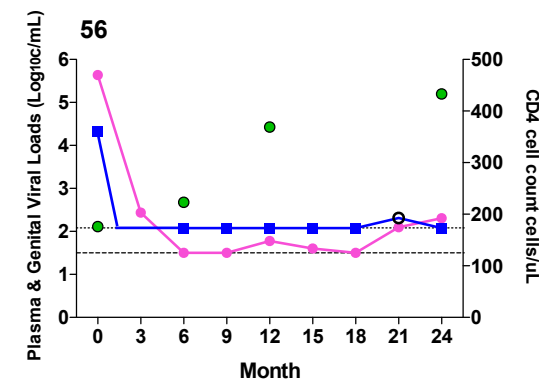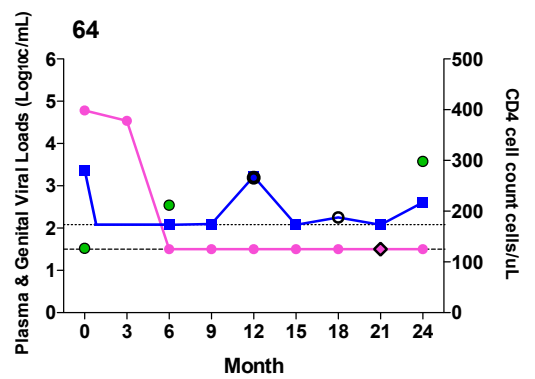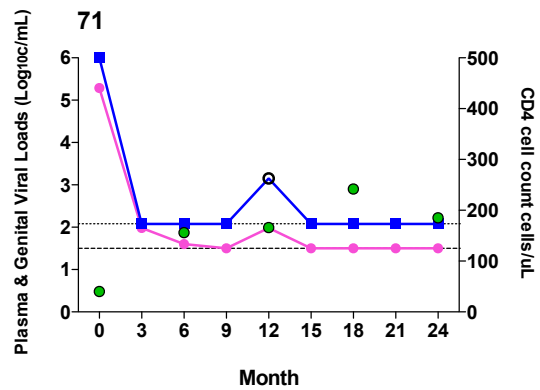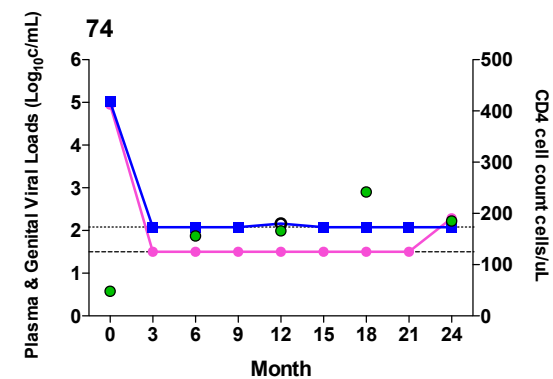

(B)

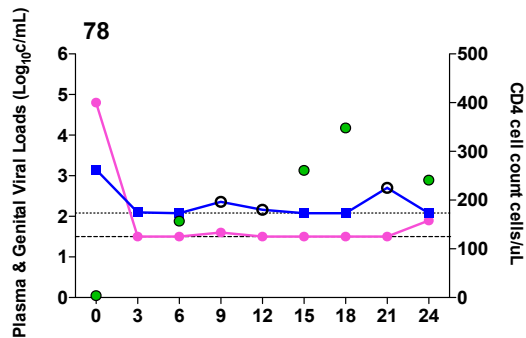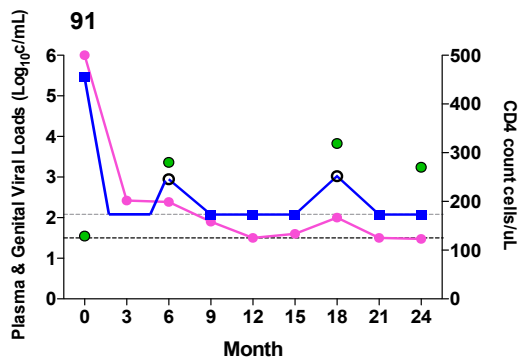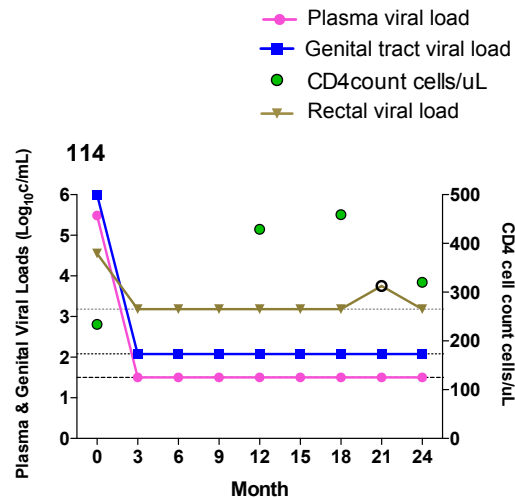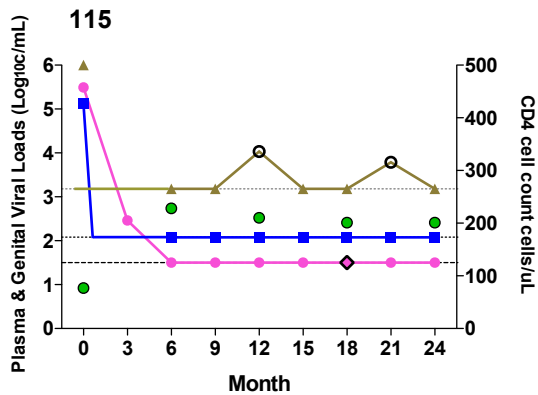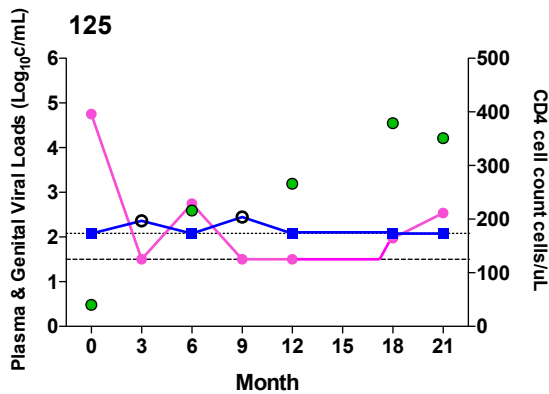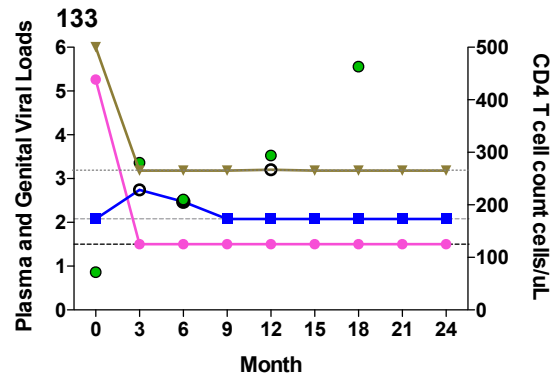

Supplement: jiaa169_suppl_supplementary_figure_1.pdf [file jiaa169_suppl_supplementary_figure_1.pdf]
