# Supplementary material
Source: PubMed Central journal article supplement (PMC7399698)

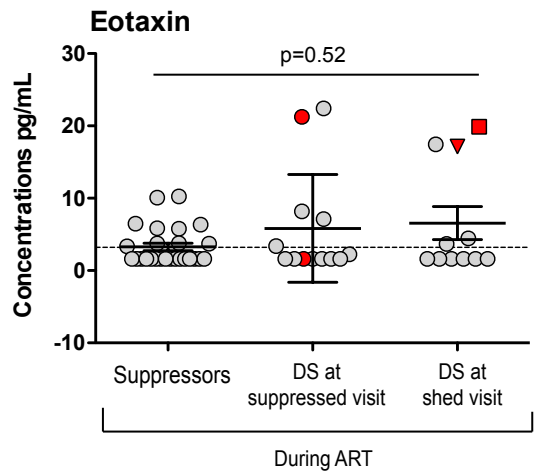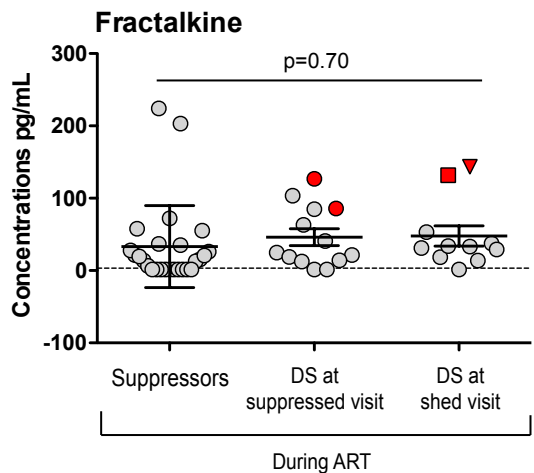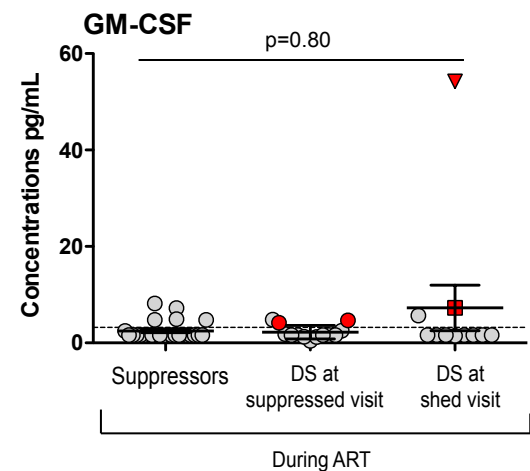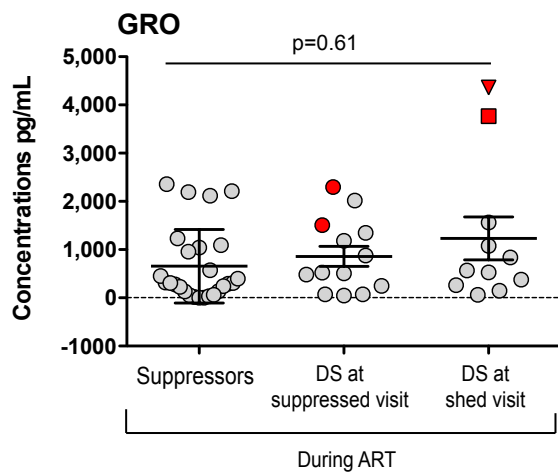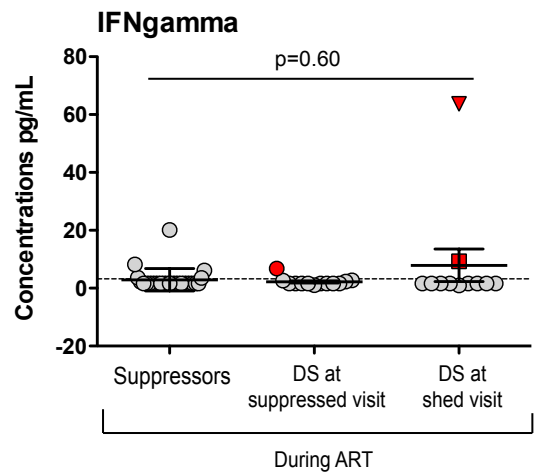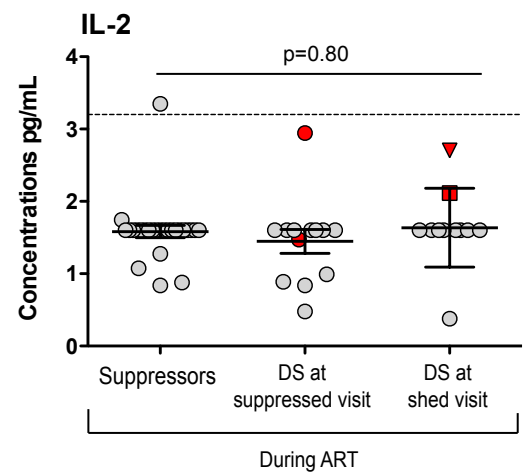

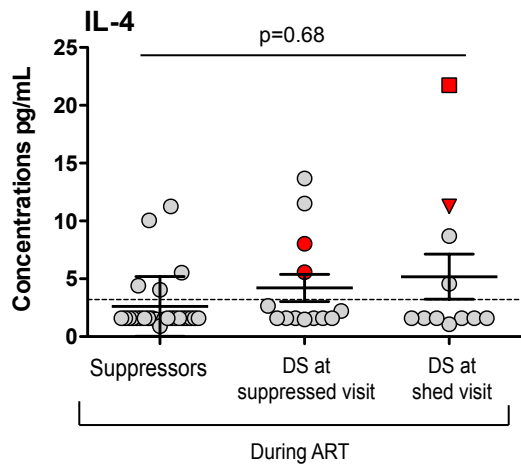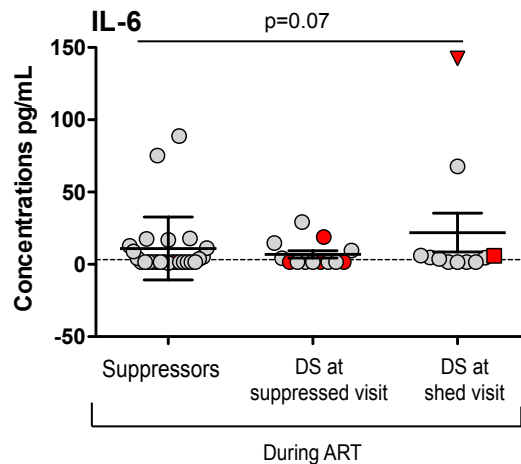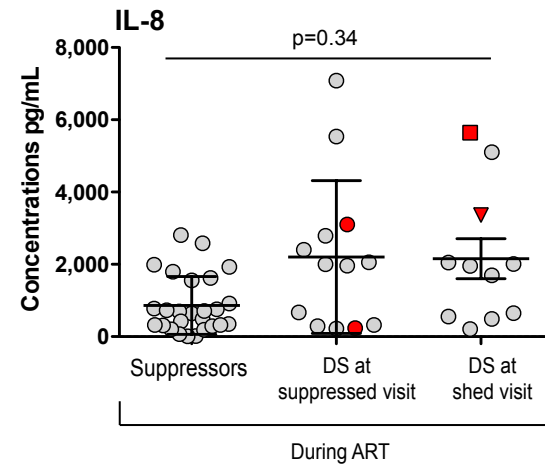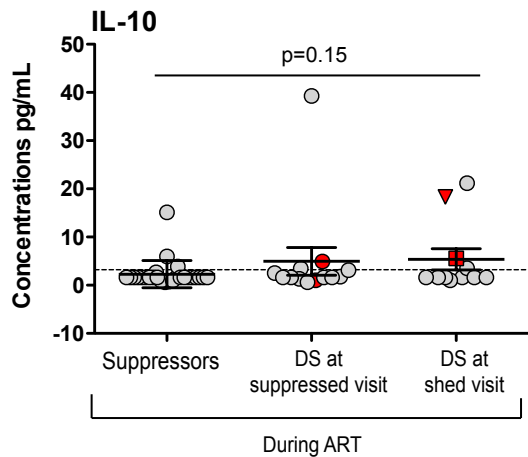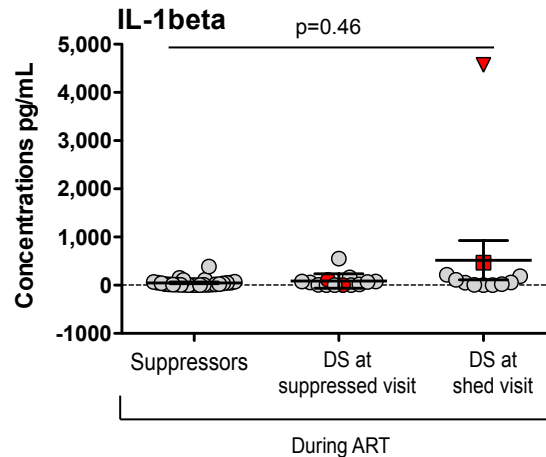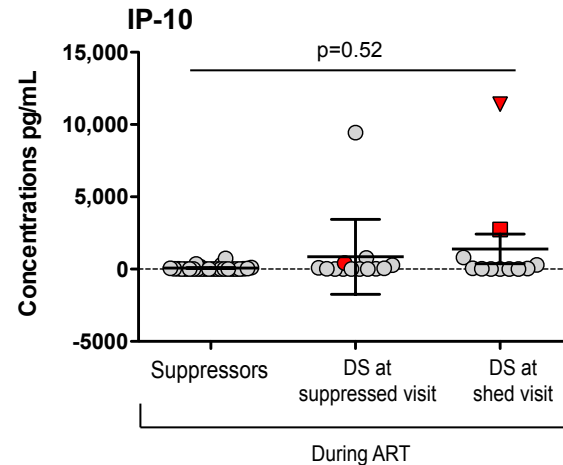

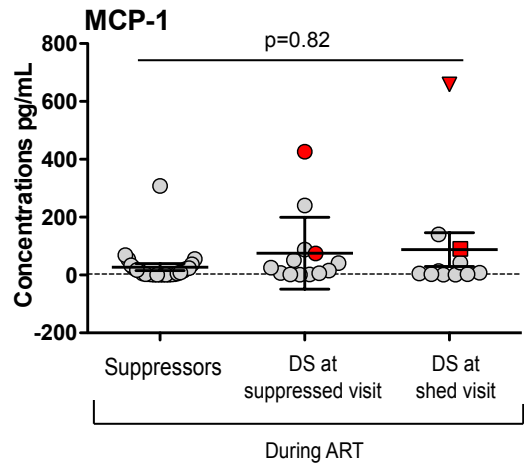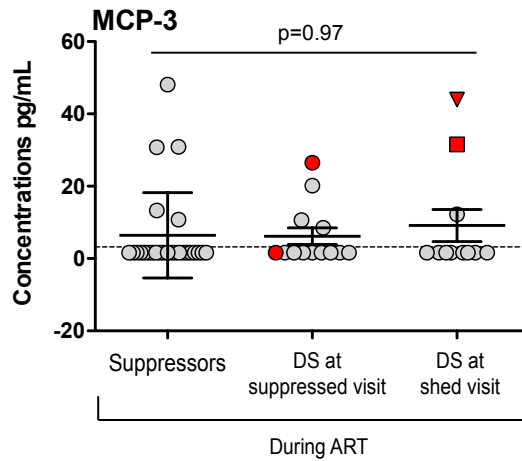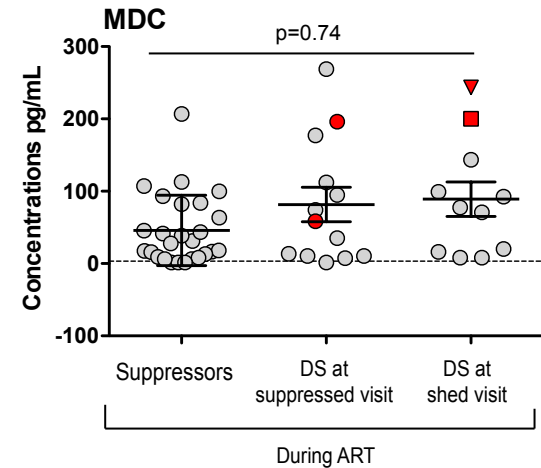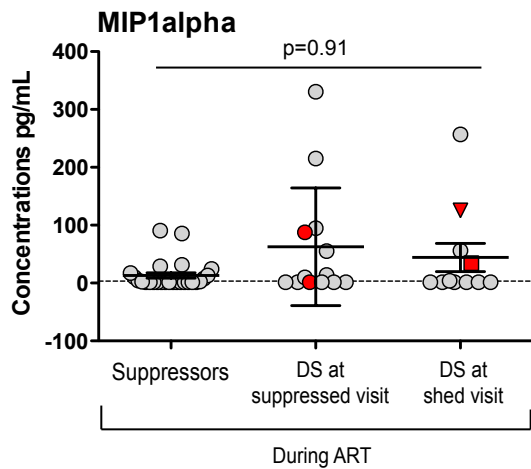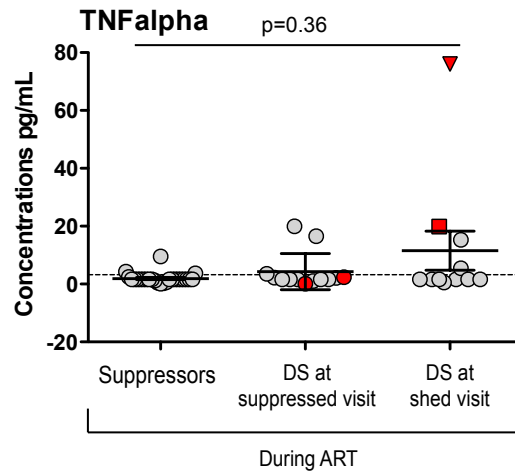

Supplement: jiaa169_suppl_supplementary_figure_2.pdf [file jiaa169_suppl_supplementary_figure_2.pdf]

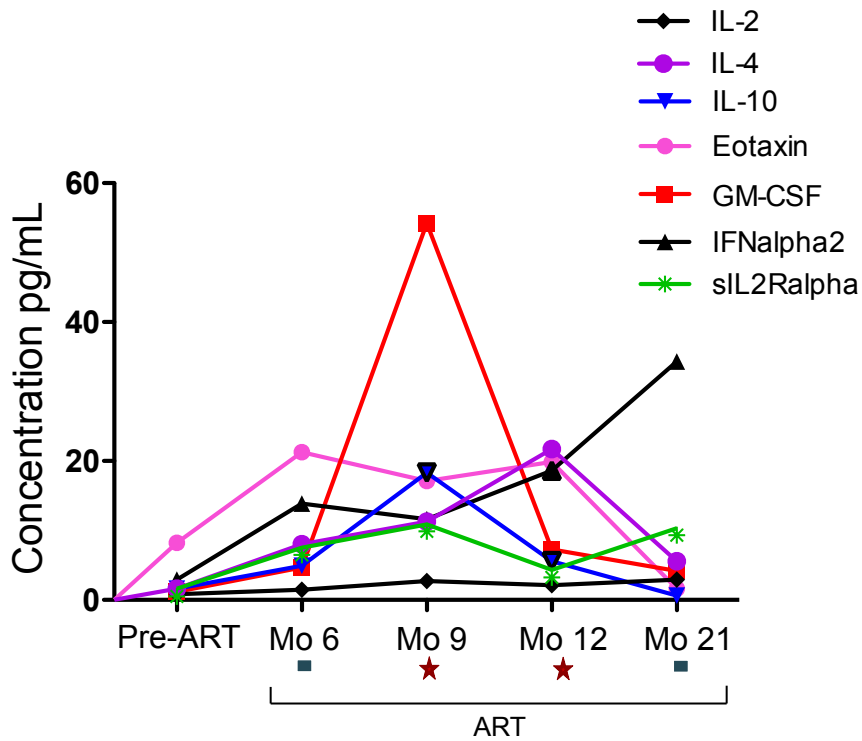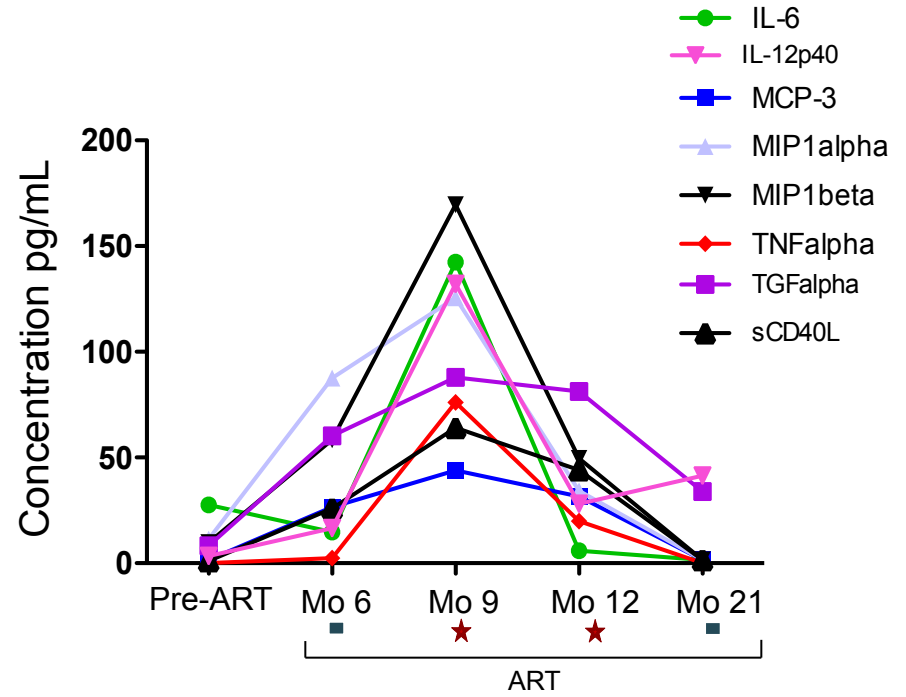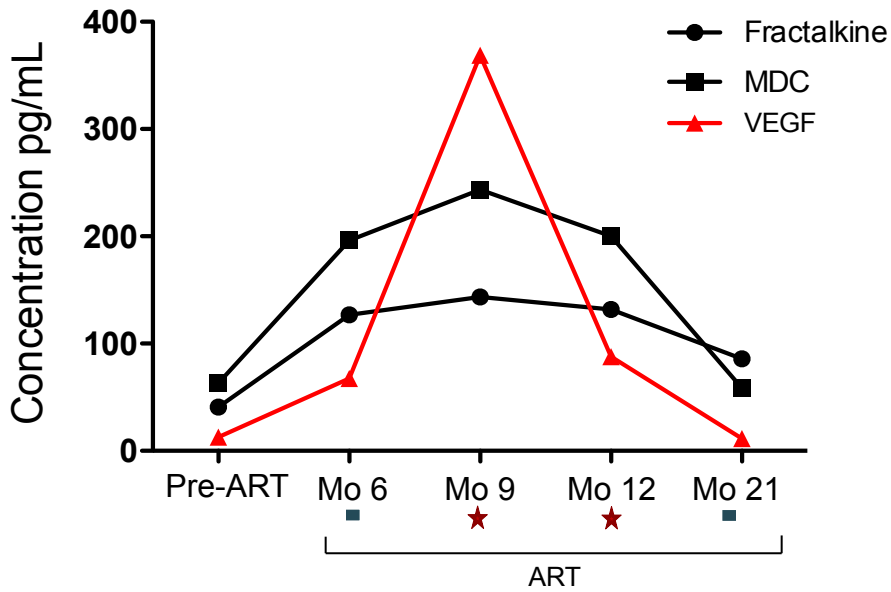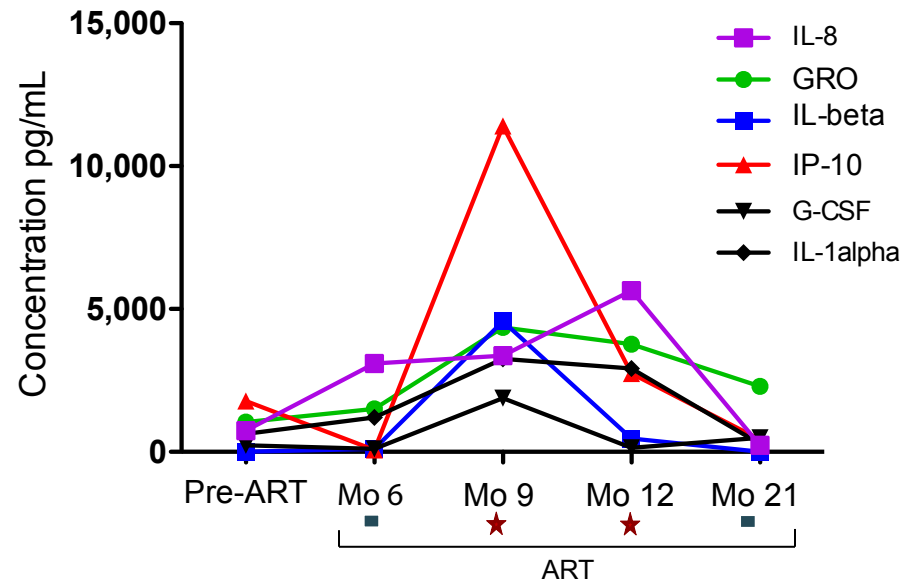

■ = Suppressed visit  
★ = Discordant shedding visit

Supplement: jiaa169_suppl_supplementary_figure_3.pdf [file jiaa169_suppl_supplementary_figure_3.pdf]
